# Supplementary material
Source: PubMed Central journal article supplement (PMC8639787)
Supplement: NIHMS1753007-supplement-Supplemental_Figures_and_Tables.pdf [file NIHMS1753007-supplement-Supplemental_Figures_and_Tables.pdf]

# Supplemental Figures

## **Evaluation of therapeutic collagen-based biomaterials in the infarcted mouse heart by extracellular matrix targeted MALDI imaging mass spectrometry**

Cassandra L. Clift<sup>1</sup>, Sarah McLaughlin<sup>2</sup>, Marcelo Muñoz<sup>2</sup>, Erik J. Suuronen<sup>2</sup>, Benjamin H. Rotstein,<sup>3</sup> Anand Mehta<sup>1</sup>, Richard R. Drake<sup>1</sup>, Emilio I. Alarcon<sup>2,3</sup>, Peggi M. Angel<sup>1\*</sup>

1. Department of Cell and Molecular Pharmacology and Experimental Therapeutics, Medical University of South Carolina, Charleston, SC, 29425, USA

2. Division of Cardiac Surgery, University of Ottawa Heart Institute, Ottawa, Ontario K1Y4W7, Canada

3. Department of Biochemistry, Microbiology, and Immunology, University of Ottawa, Ottawa, Ontario K1H8M5, Canada

\*Peggi M. Angel, Ph.D.  
Associate Professor  
Department of Cell and Molecular Therapeutics  
& Experimental Therapeutics  
Charleston, SC USA  
Tele: 1.843.792.8410  
Email: [angelp@musc.edu](mailto:angelp@musc.edu)  
Fax: 1.843.792.0481



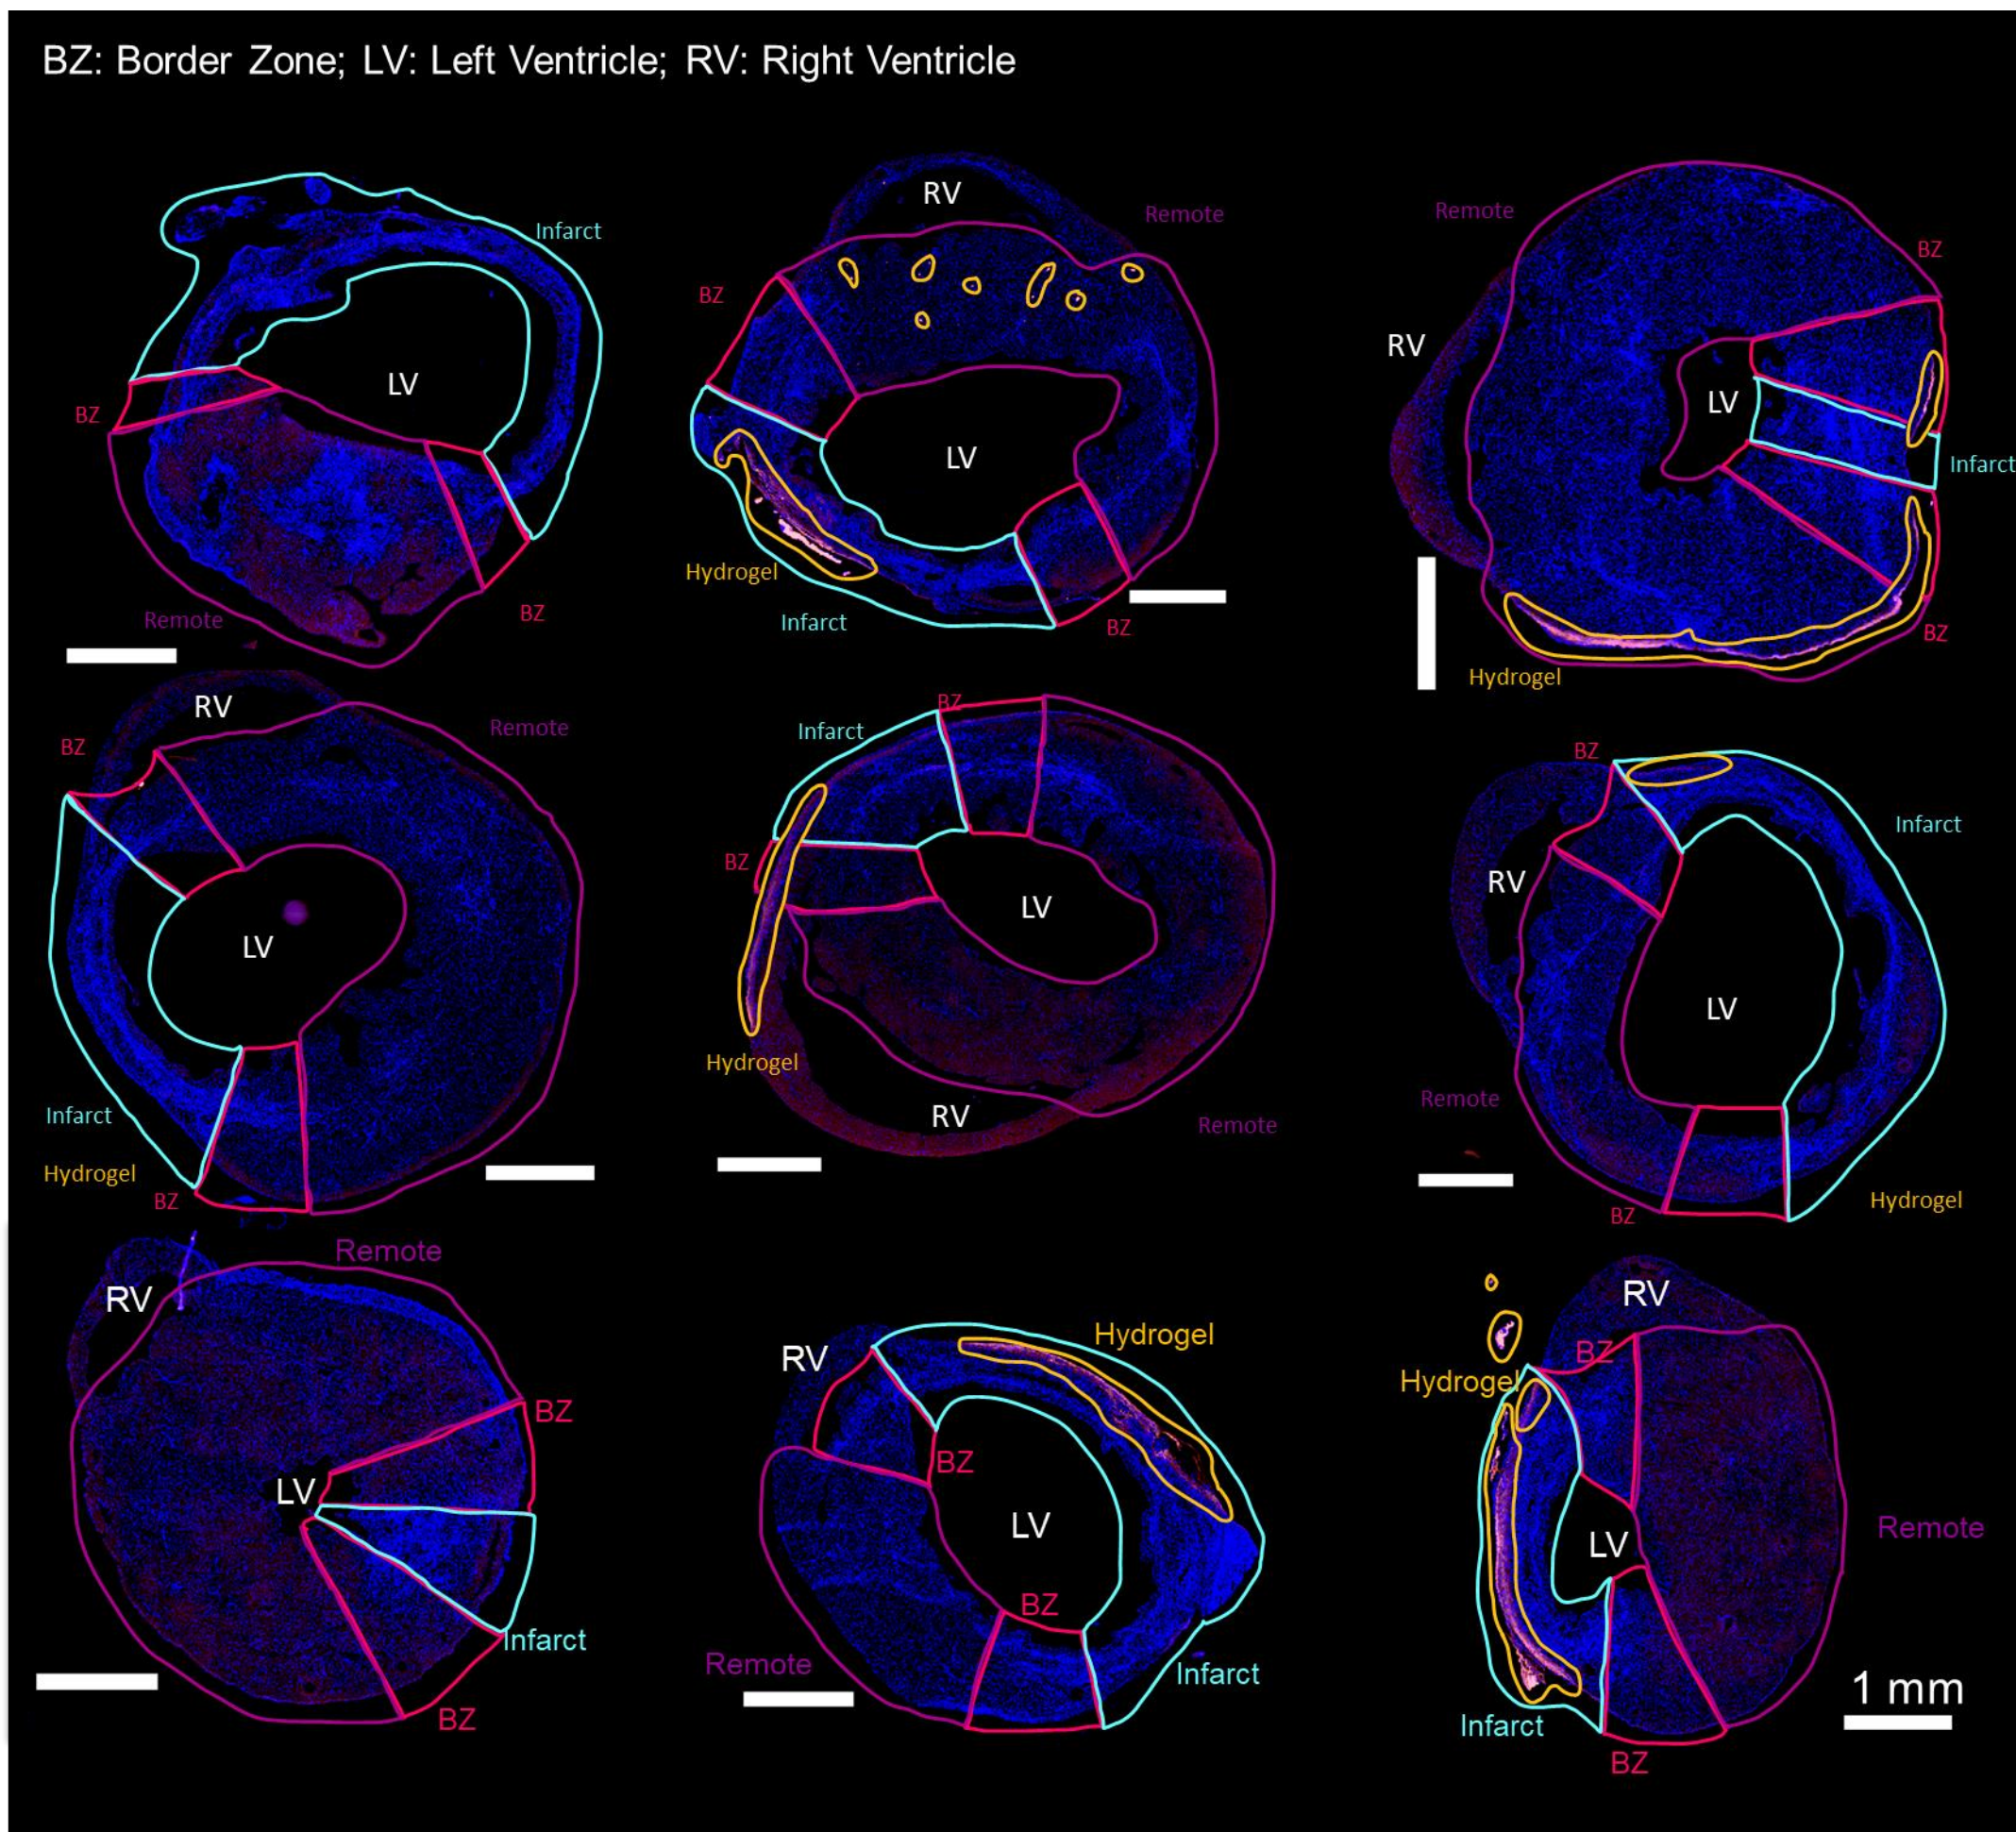

**Supplementary Fig. 1:** Representative fluorescence microscopy imaged heart tissue sections with ROI annotations from all mice included in this study (n=3 per treatment group). All mice were confirmed to have a Left Ventricular Ejection Fraction of <50% for initial injury. representative annotated tissue section for each biological replicate shown across three patient categories: PBS injected control, rhCI hydrogel, and rhCIII hydrogel. Annotated regions include HIS (hydrogel injection site), Infarct (region of myocardial infarction, identified via previous studies (McLaughlin, 2019); BZ (border zone, region immediately adjacent to infarct), and remote (region furthest from infarct). LV: Left Ventricle. RV: Right Ventricle. Scale bar is 1 mm.



**a**

| HYP (P <sup>ox</sup> ) Position |         |         | b | 897.4425       | y | HYP (P <sup>ox</sup> ) Position |         |         |
|---------------------------------|---------|---------|---|----------------|---|---------------------------------|---------|---------|
| 1,2                             | 1,3     | 2,3     |   |                |   | 1,2                             | 1,3     | 2,3     |
| --                              | --      | --      | 1 | G              | 9 | --                              | --      | --      |
| 214.130                         | 214.130 | 214.130 | 2 | R              | 8 | 840.421                         | 840.421 | 840.421 |
| 327.178                         | 327.178 | 311.183 | 3 | P <sup>1</sup> | 7 | 684.320                         | 684.320 | 684.320 |
| 384.200                         | 384.199 | 368.204 | 4 | G              | 6 | 571.272                         | 571.272 | 587.267 |
| 513.242                         | 513.242 | 497.247 | 5 | E              | 5 | 514.251                         | 514.251 | 530.246 |
| 612.310                         | 612.310 | 596.315 | 6 | V              | 4 | 385.208                         | 385.208 | 401.203 |
| 669.332                         | 669.332 | 653.337 | 7 | G              | 3 | 286.140                         | 286.140 | 302.135 |
| 782.380                         | 766.384 | 766.384 | 8 | P <sup>2</sup> | 2 | 229.118                         | 229.118 | 245.113 |
| --                              | --      | --      | 9 | P <sup>3</sup> | 1 | 116.071                         | 132.066 | 132.066 |

**b**

## On-Tissue MS/MS

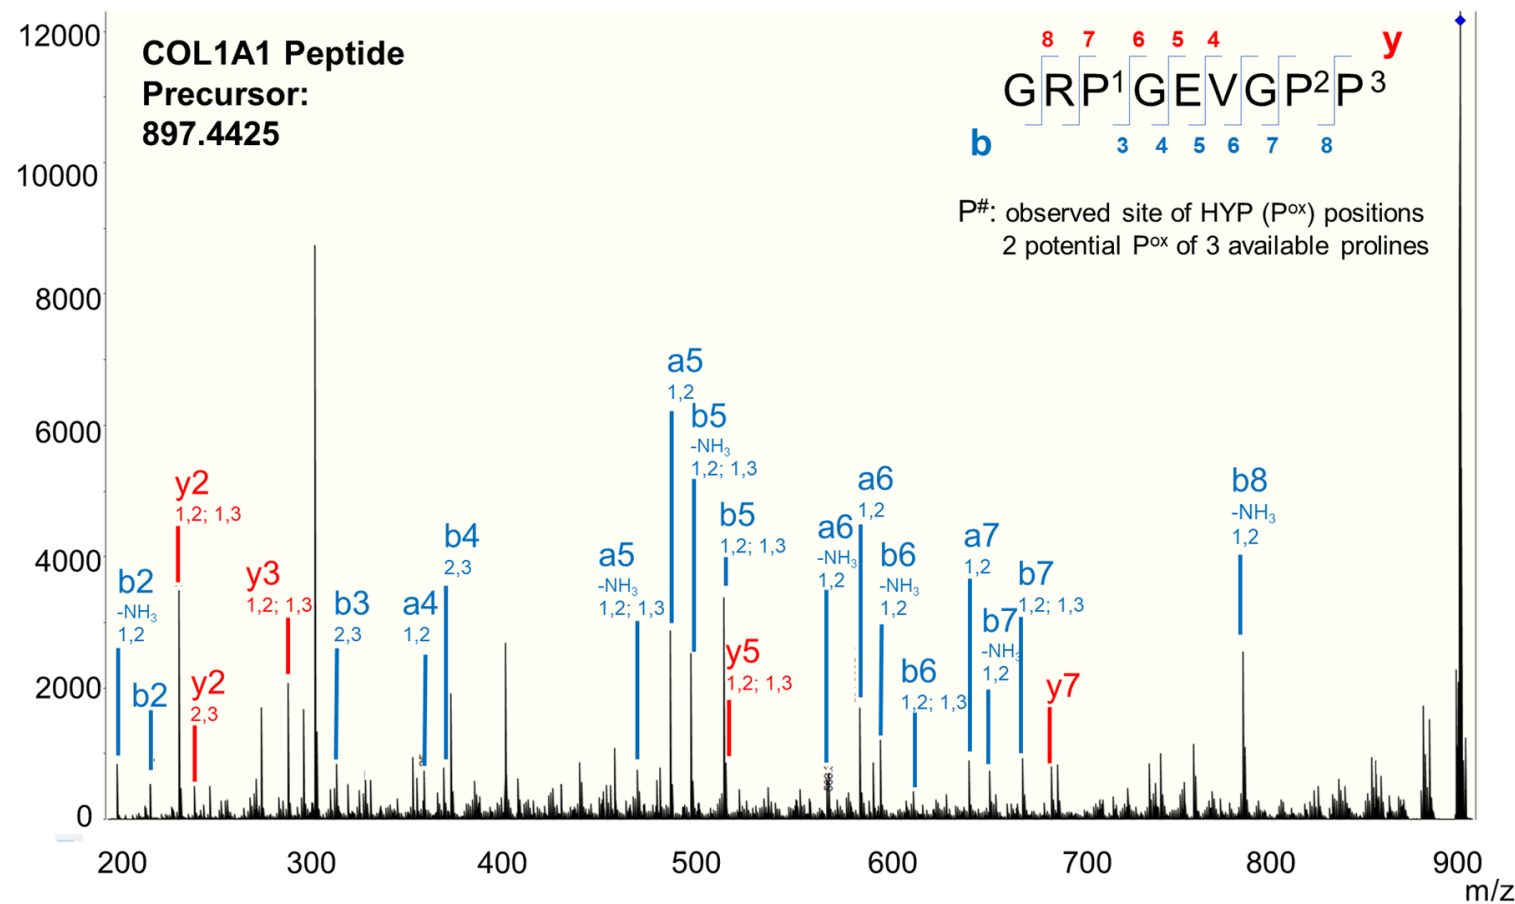**c**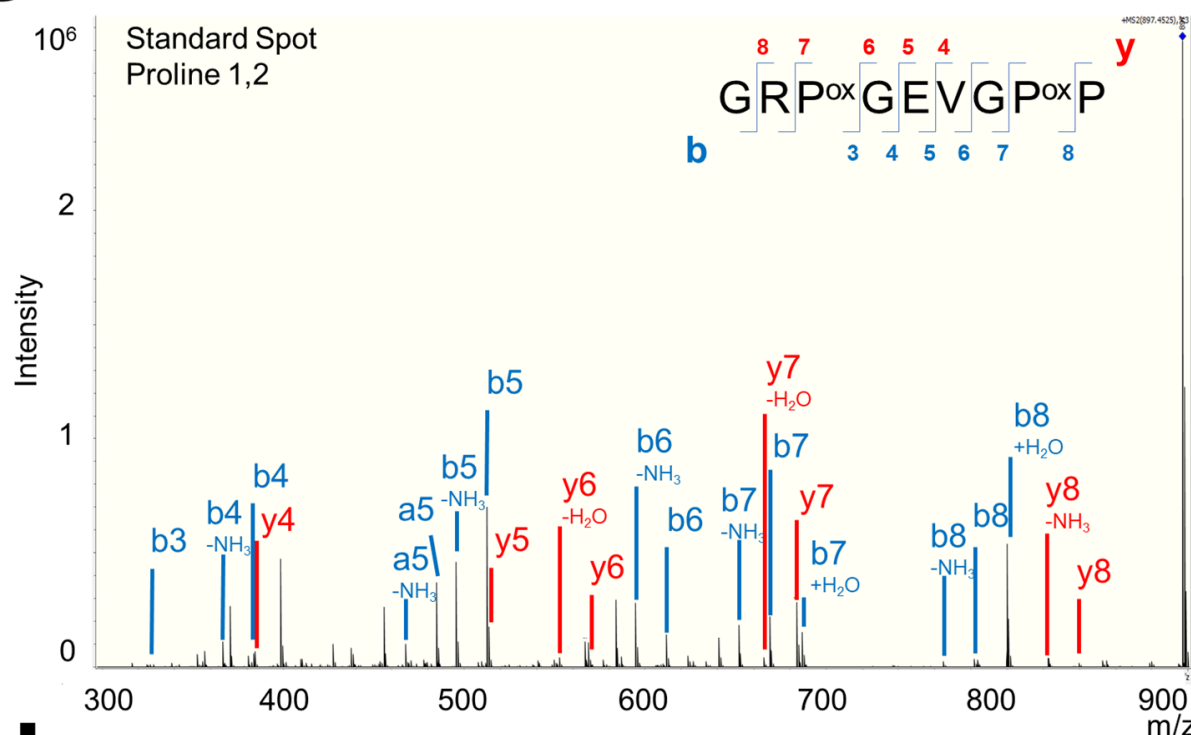**e**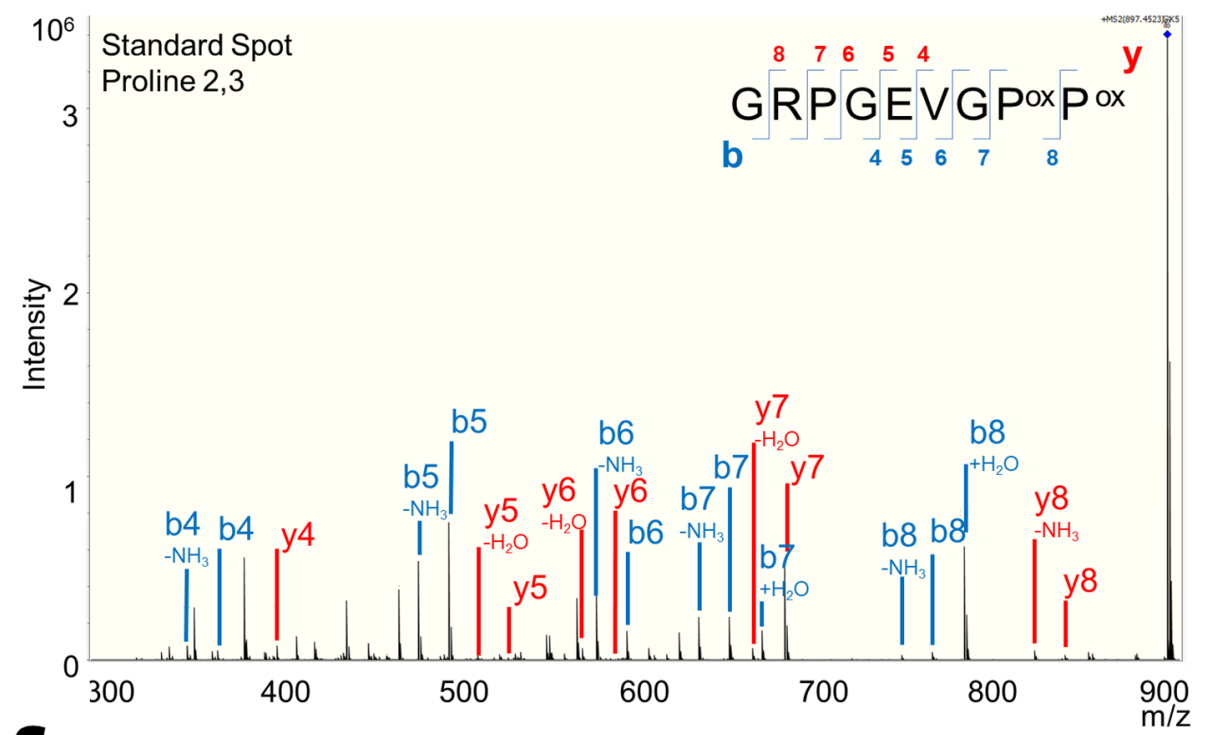**d**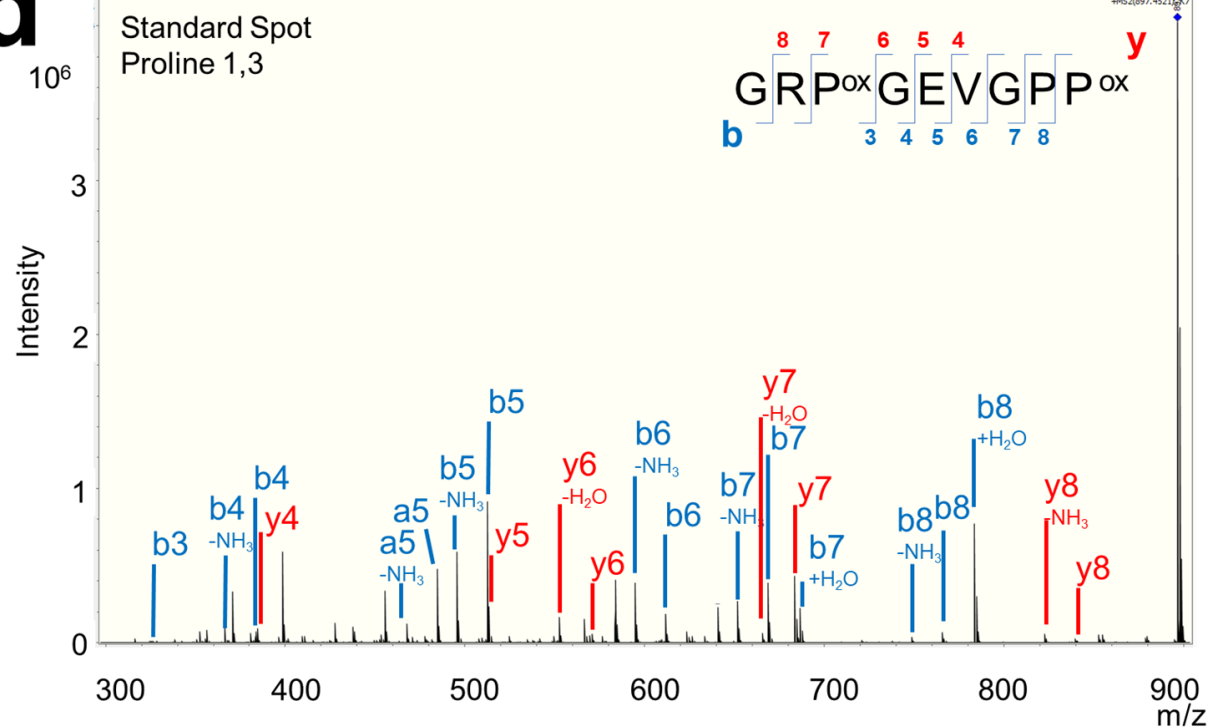**f**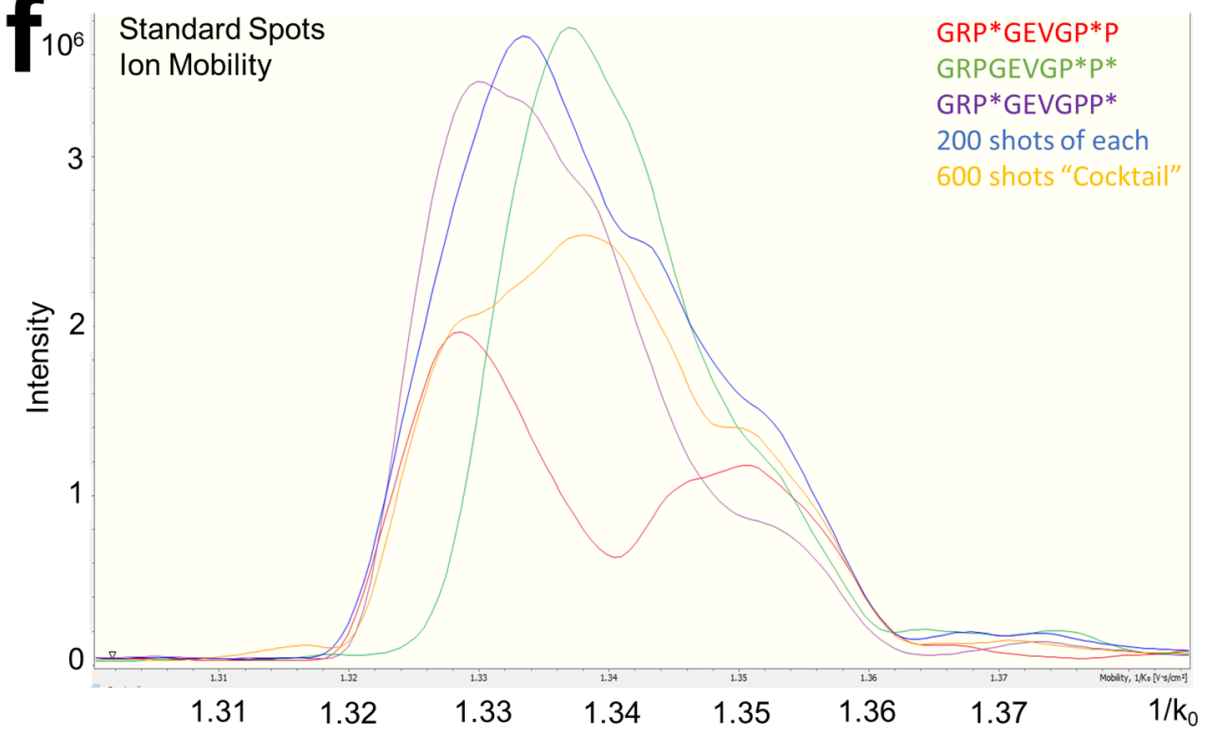

**Supplementary Figure S2. On-tissue MALDI-IMS provides evidence of peptide sequence validation and hydroxyproline site occupancy.** **a.** Table showing potential fragment ion m/z depending on hydroxyproline site localization positions of P1-P2, P2-P3, or P1-P3. **b.** Annotated MALDI-MS/MS spectra produced by CID fragmentation on tissue. Identified b (blue) and y (red) ions are shown. Precursor ion is 897.4425 m/z, corresponding to a hydroxyproline containing COL1A1 peptide. P#: observed site of HYP (P<sup>ox</sup>) positions. There are 2 potential P<sup>ox</sup> sites out of 3 available prolines within the sequence. **c-e.** Annotated MALDI-MS/MS spectra produced by CID fragmentation of synthesized peptide standards of the three potential HYP site localizations (**Supp. Fig S4**). **f.** Ion Mobility study of the three synthesized peptides standards shown in **c-e** (and **Supp. Fig. S4**). An additional study was done of the three combined standards spotted ("cocktail") as well as on-target summed acquisition of the three standards spotted separately. 600 shots were taken for each acquisition.

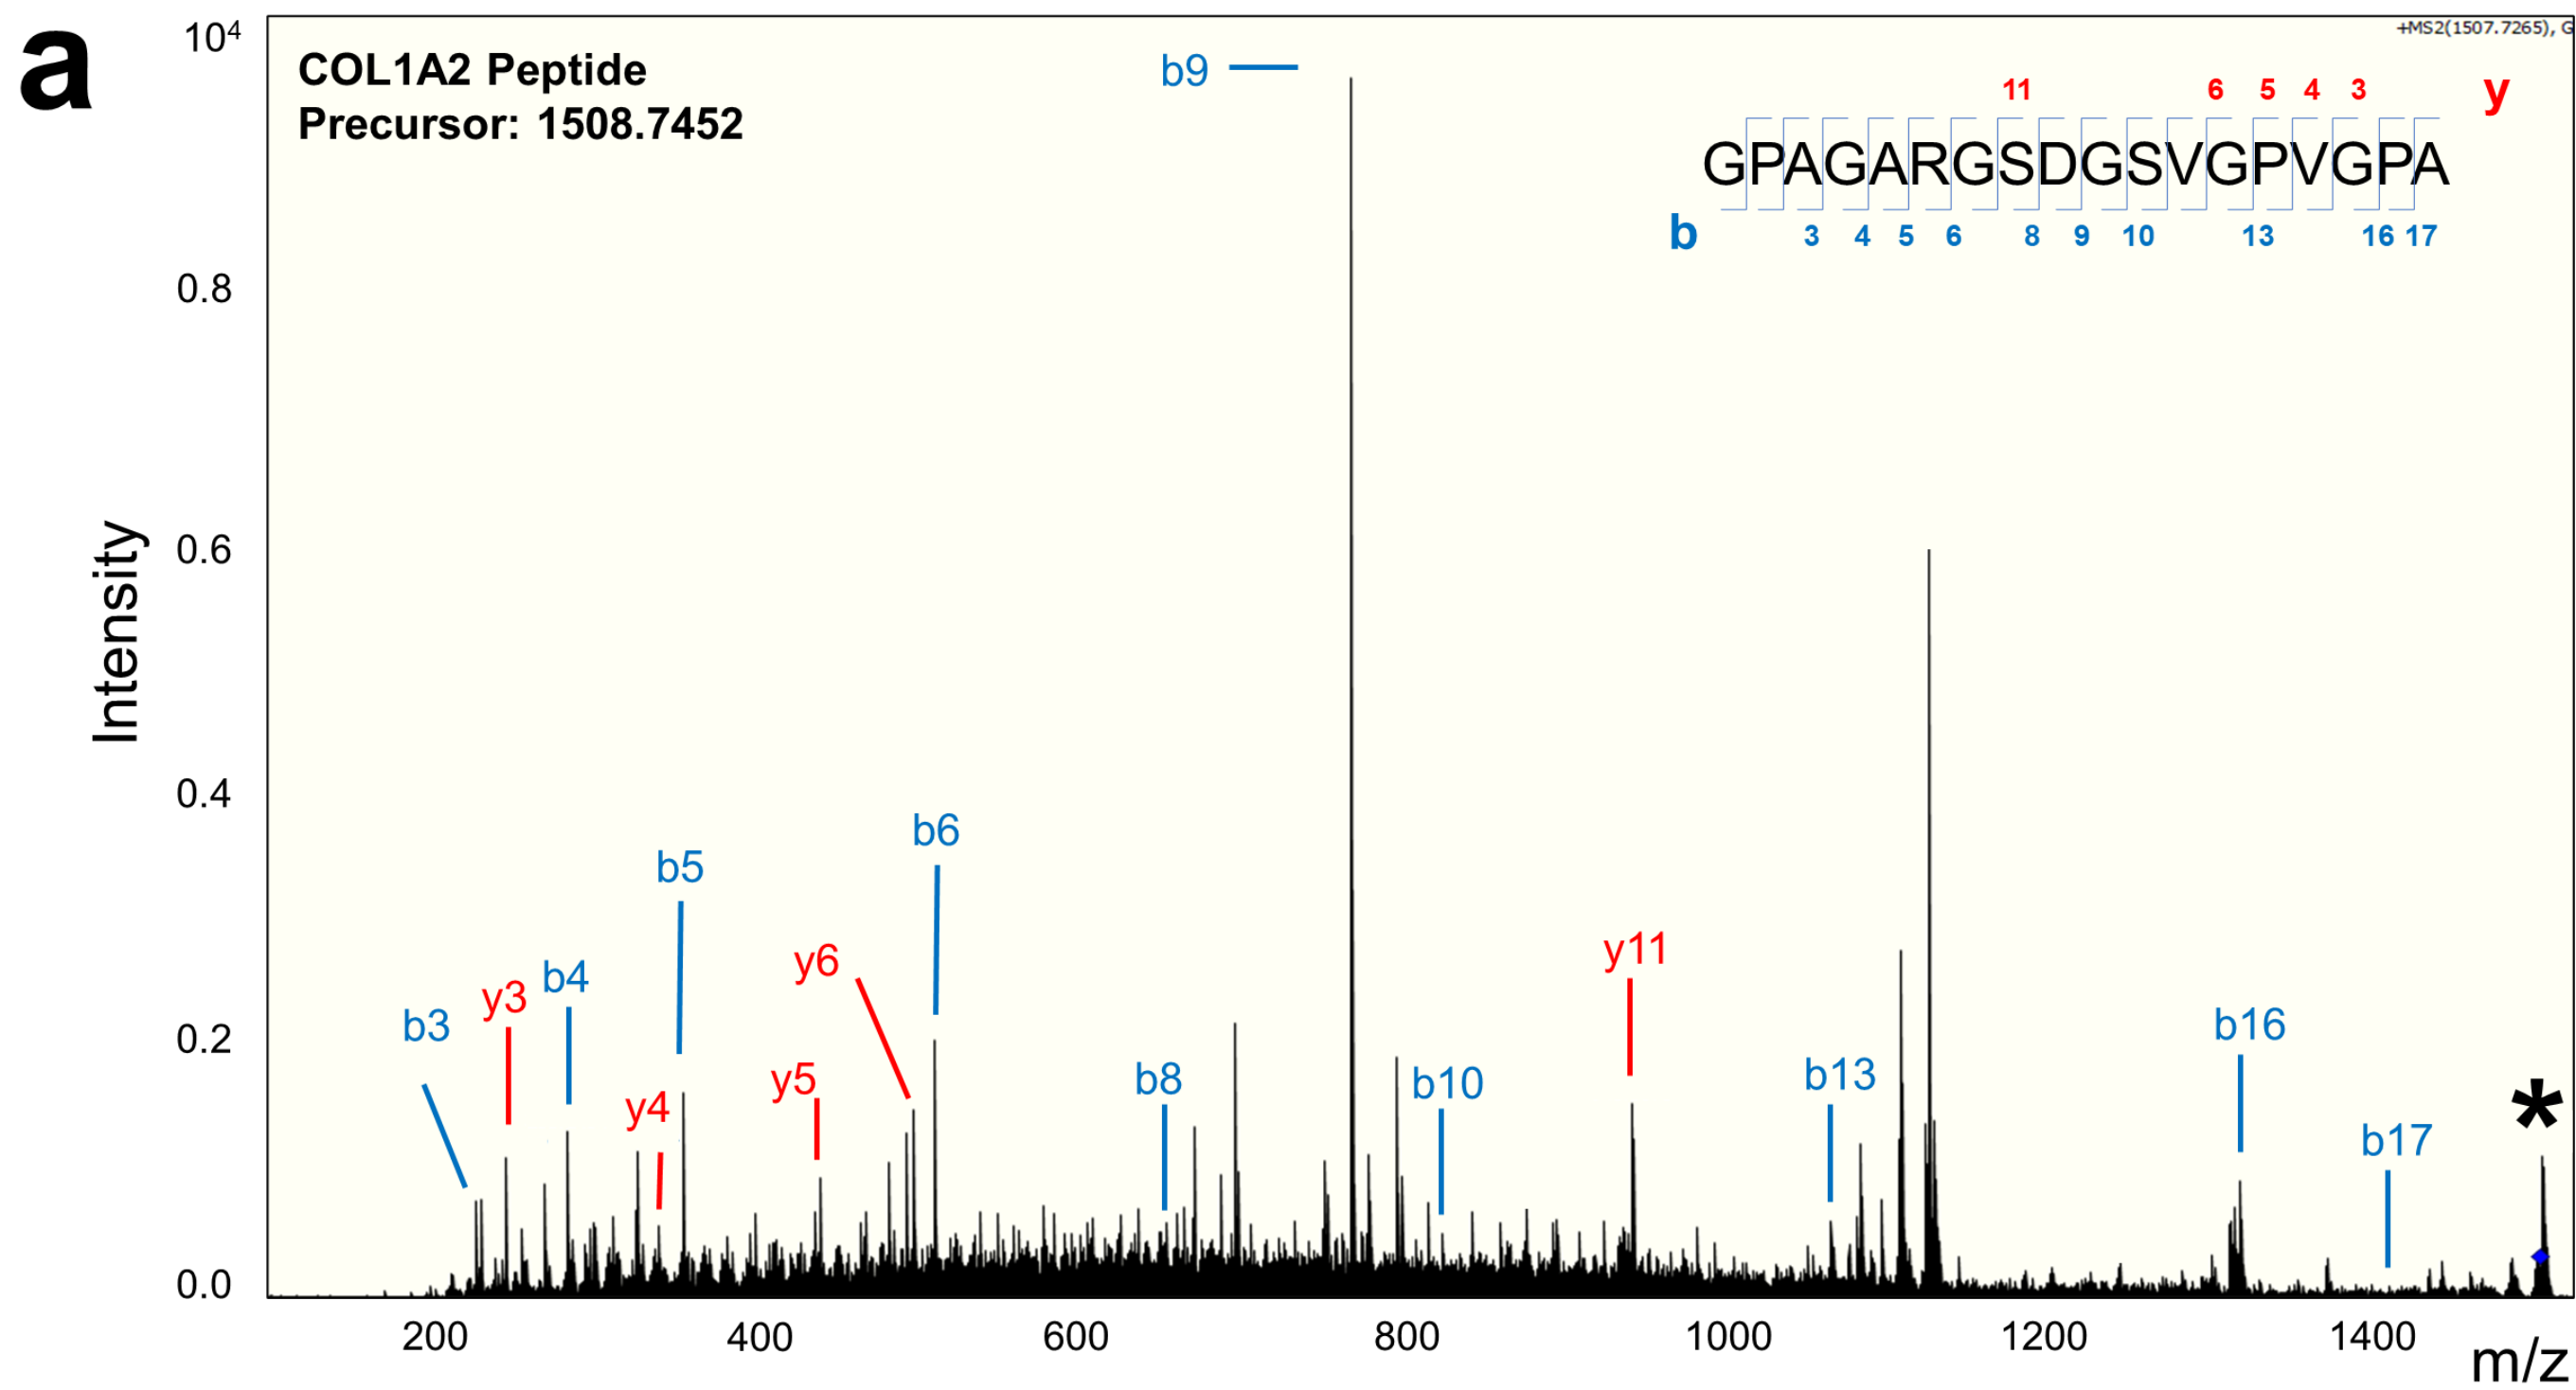

**Supplementary Figure S3. On-tissue MALDI-IMS provides evidence of peptide sequence validation and hydroxyproline site occupancy. a.** Annotated MALDI-MS/MS spectra produced by CID fragmentation. Identified b (blue) and y (red) ions are shown. Precursor ion is 1508.7452 m/z, corresponding to an unmodified COL1A2 peptide.

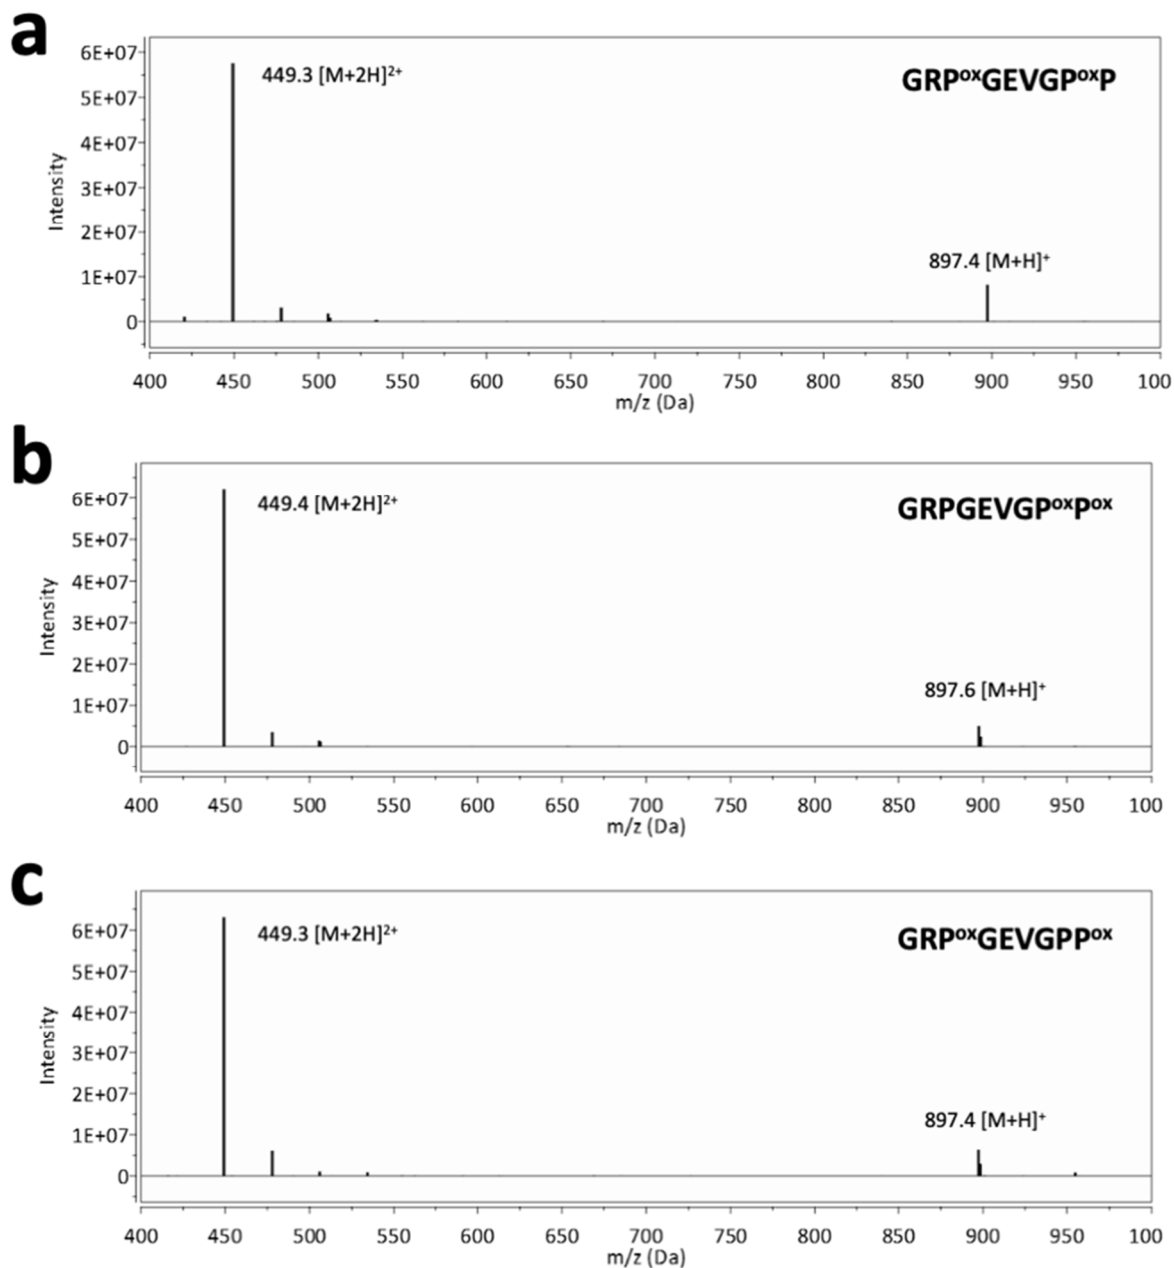

Supplemental Figure S4. Confirmation of the synthesized peptide mass. a. Mass Spectrometry data of the synthesized peptide GRP<sup>ox</sup>GEVGP<sup>ox</sup>P, b. synthesized peptide GRPGEVGP<sup>ox</sup>P<sup>ox</sup>, and c. synthesized peptide GRP<sup>ox</sup>GEVGPP<sup>ox</sup>. Mass Spectrometry analysis was performed in a Waters ACQUITY UPLC XEVO TQD with a column 2.1x100 mm BEH C8, and a flow rate of 0.5 mL/min, a gradient of 2% to 95% of Acetonitrile in 9 minutes, and constant 0.1% of Formic Acid.

**a**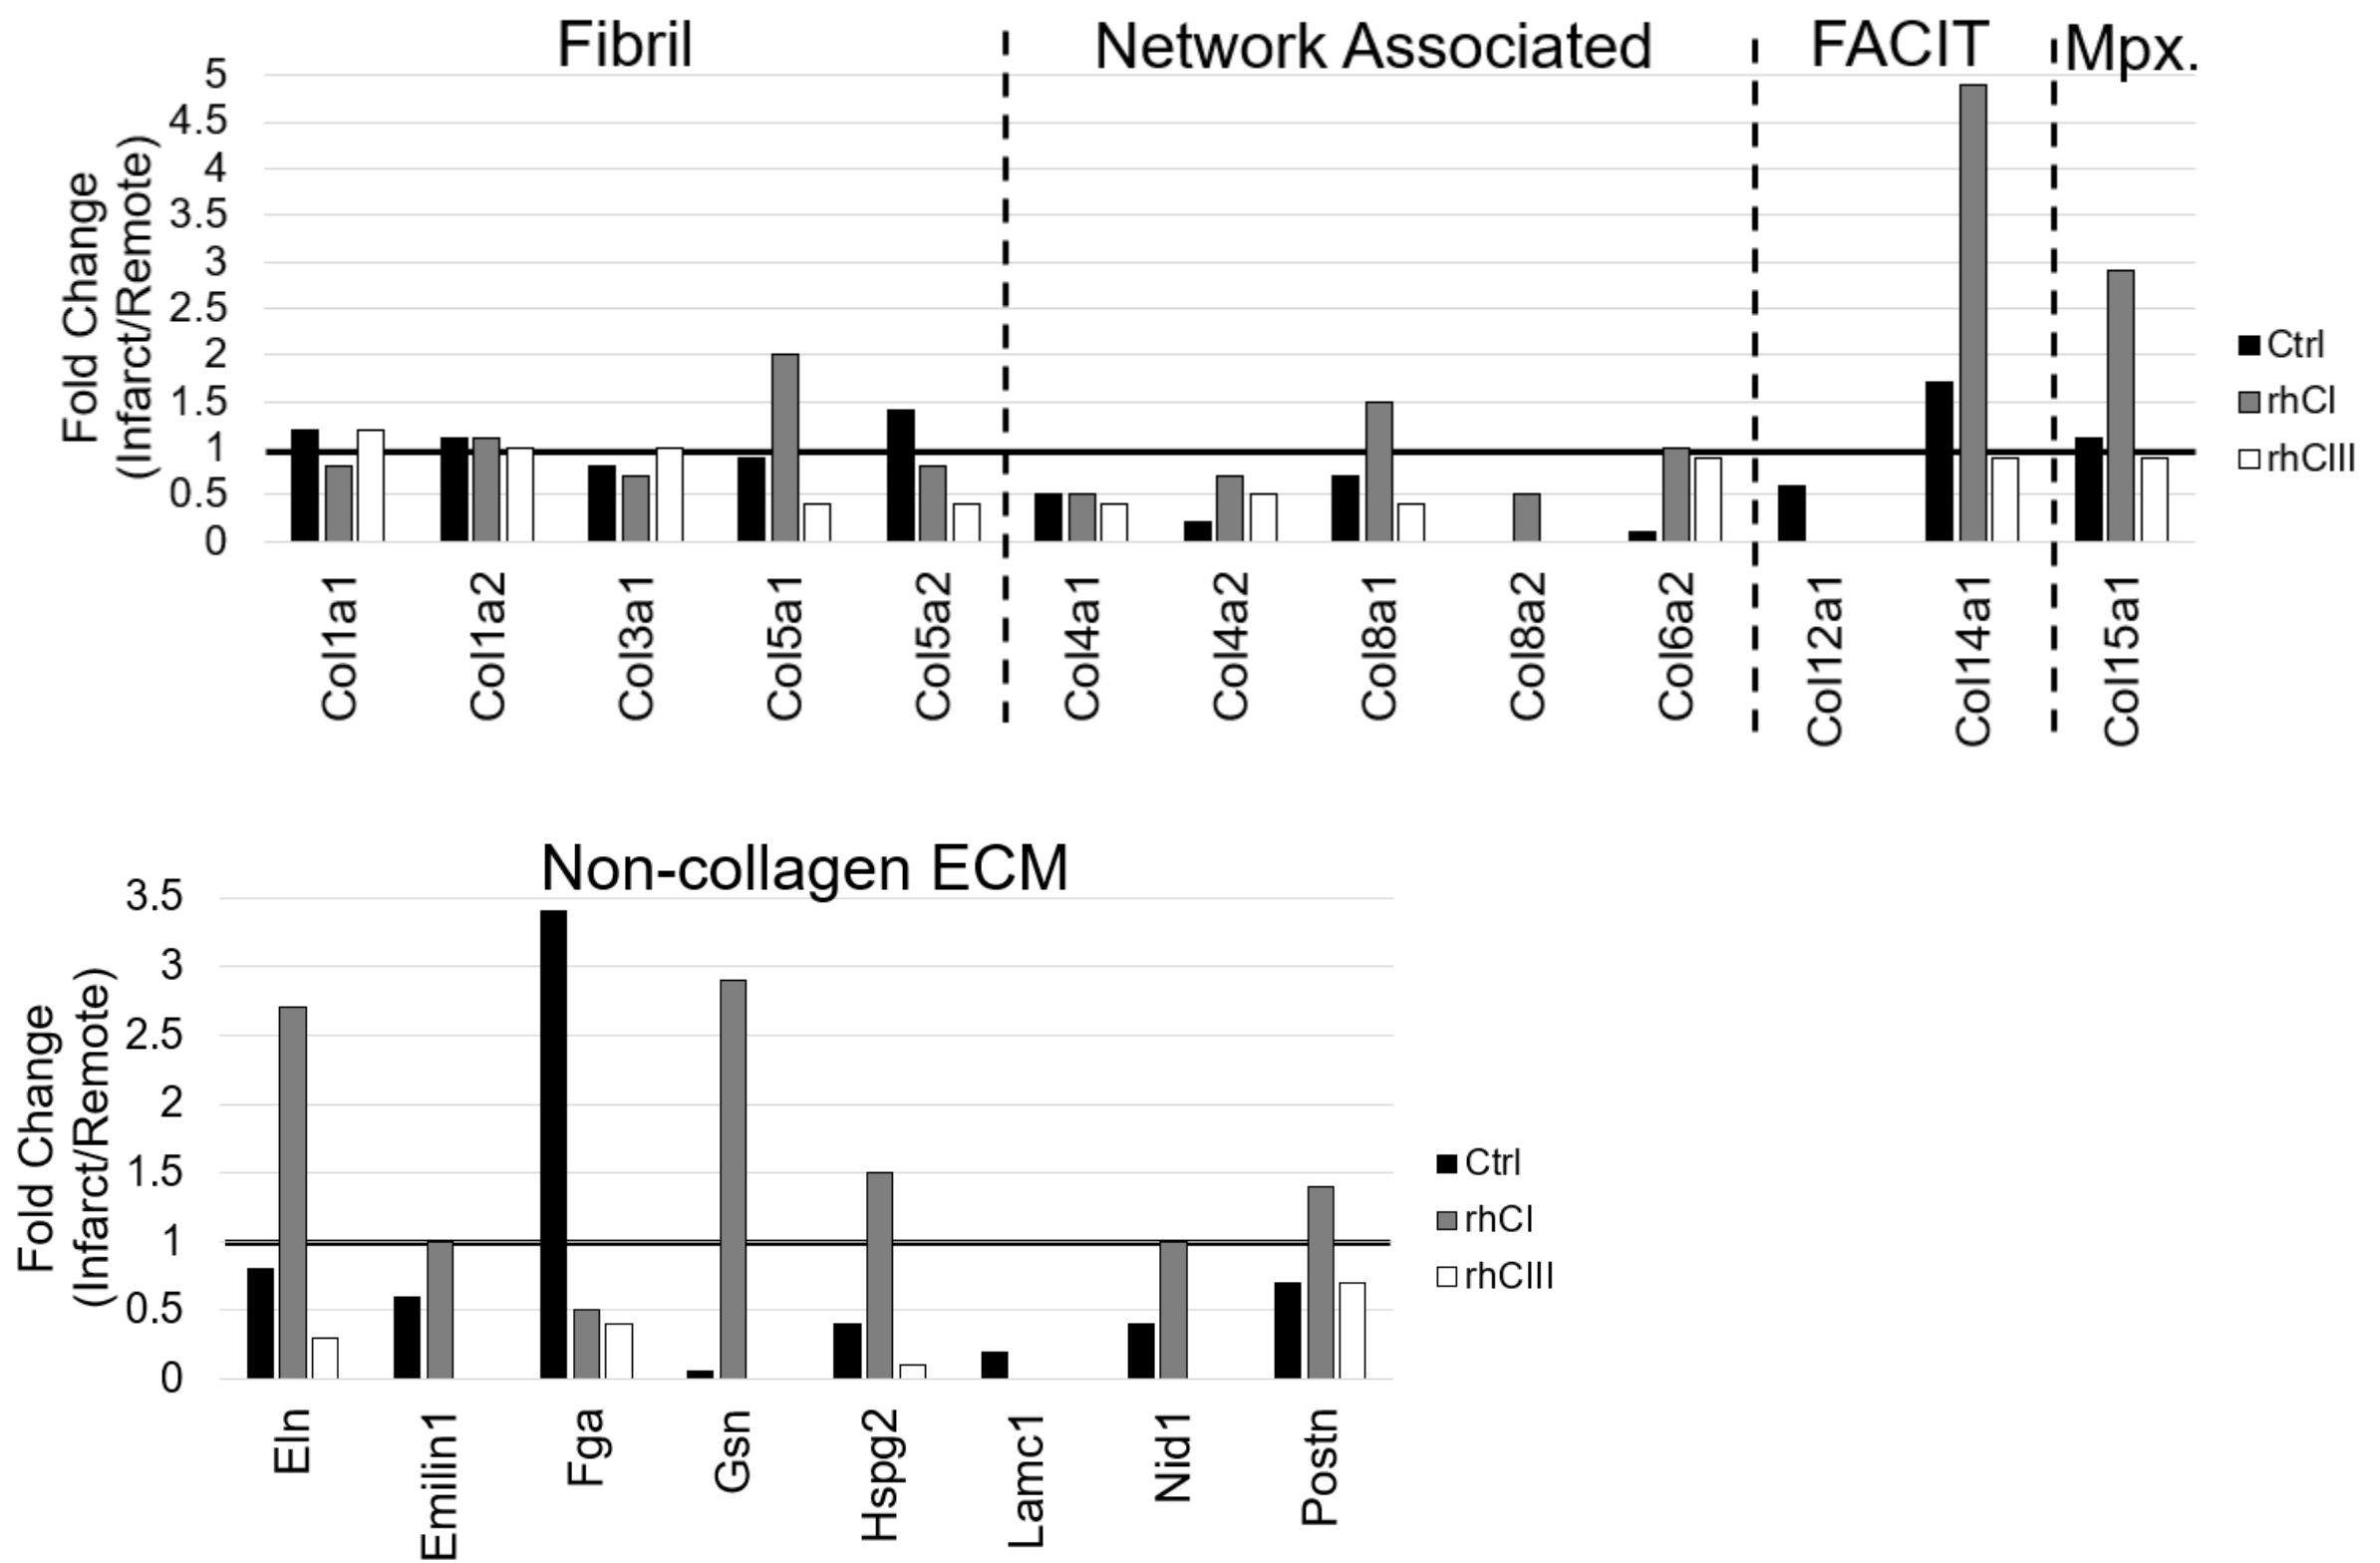

**Supplemental Figure S5.** Protein Fold Change intensity values of Infarct/Remote ROIs for each treatment group (PBS control, rhCI hydrogel, rhCIII hydrogel). Raw values can be seen in **Supplemental Table S3**. Proteins are organized by collagen subtype (FACIT: Fibril associated collagen with interrupted triple helices; Mpx: Multiplexin) and non-collagen proteins.

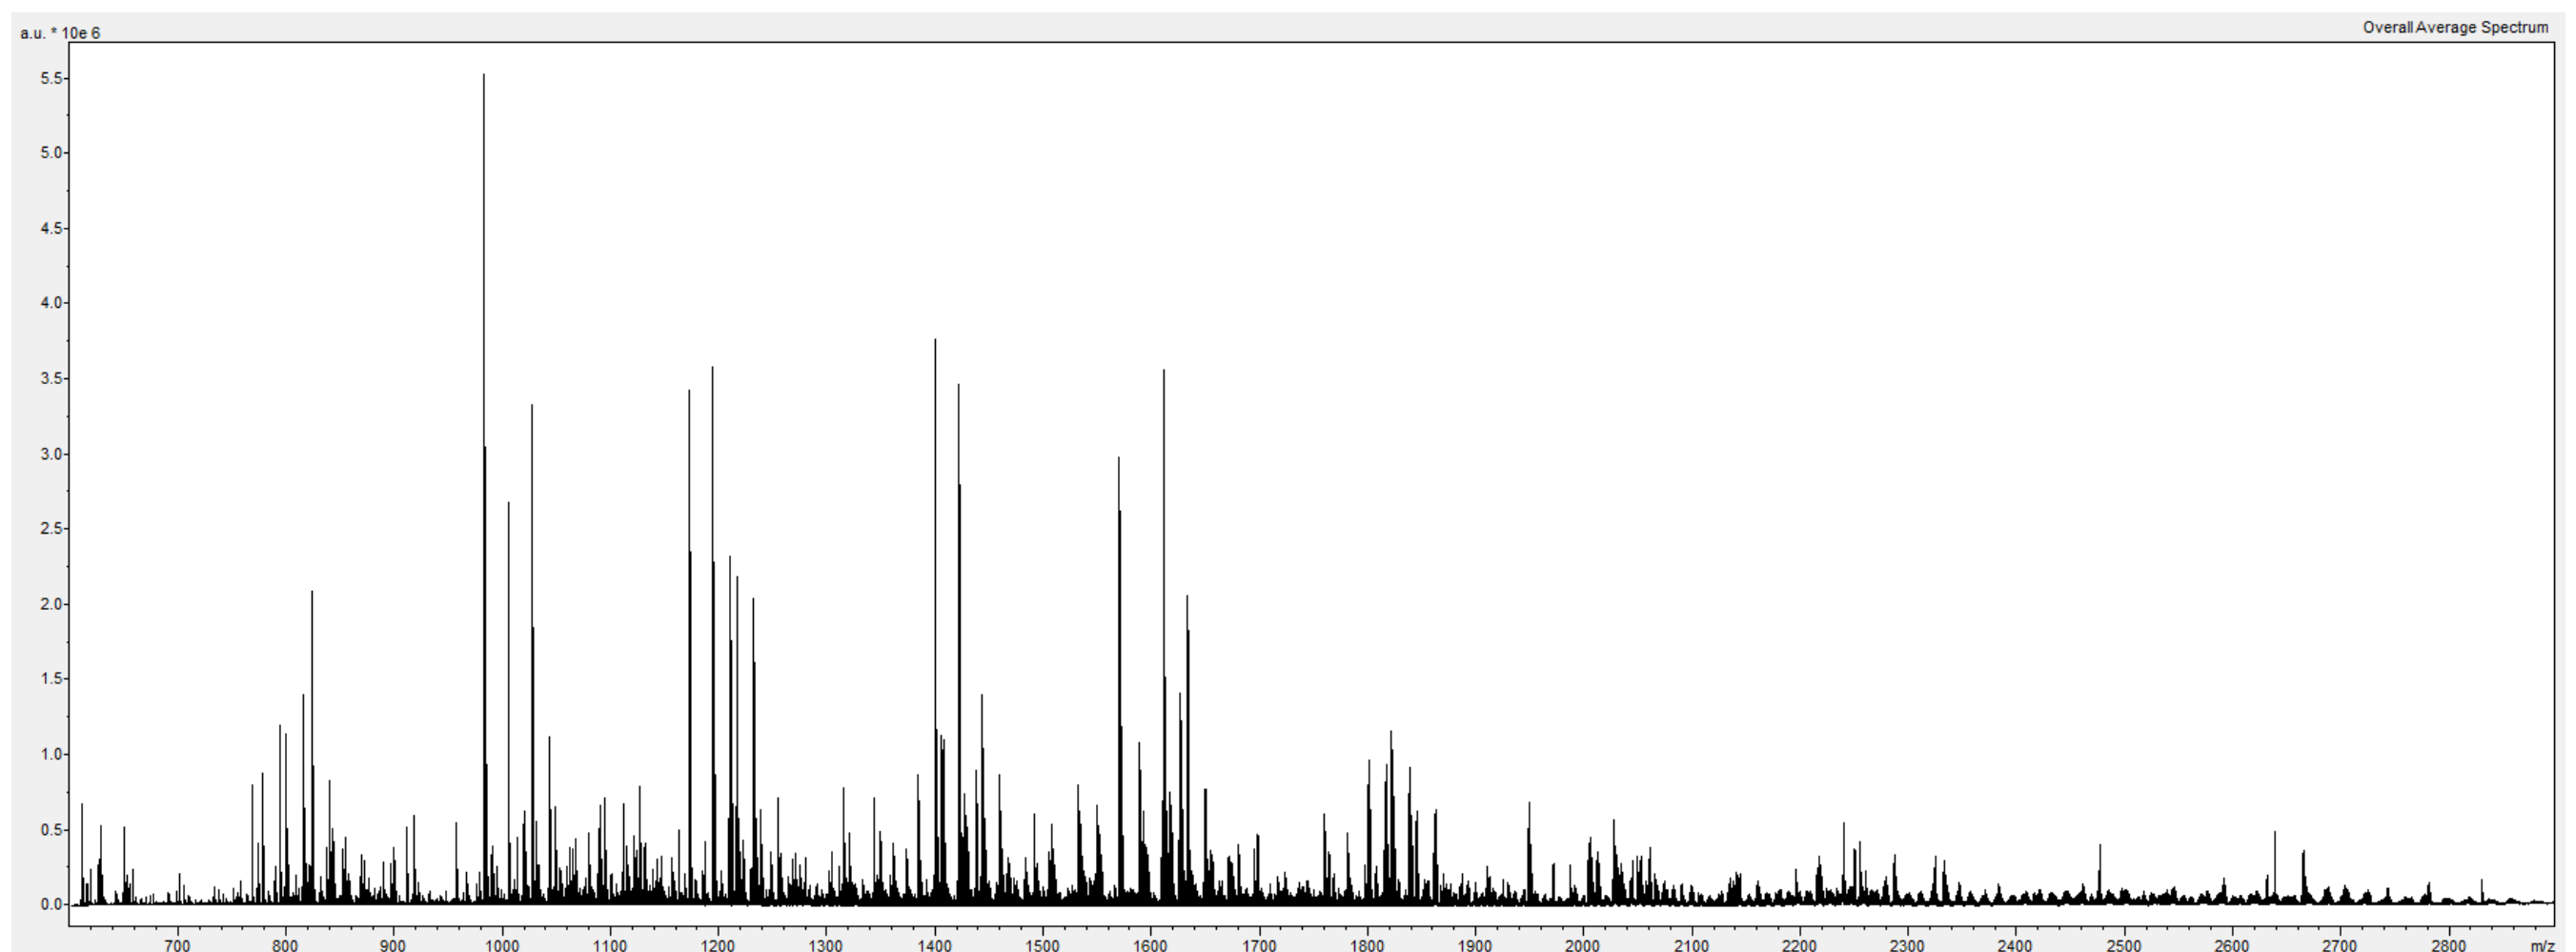

**Supplemental Figure S6.** Representative collagenase spectra. MALDI IMS analysis by 7.0 Tesla solariX™ Legacy FT-ICR (Bruker Scientific, LLC) operated in positive ion broadband mode over m/z range 600-2500. A transient length of 1.050 ms was used with a resolving power of 29000 calculated at 1400 m/z. Laser settings used were 200 shots/pixel with a 75  $\mu\text{m}$  step size.

# Supplemental Tables

## **Evaluation of therapeutic collagen-based biomaterials in the infarcted mouse heart by extracellular matrix targeted MALDI imaging mass spectrometry**

Cassandra L. Clift<sup>1</sup>, Sarah McLaughlin<sup>2</sup>, Marcelo Muñoz<sup>2</sup>, Erik J. Suuronen<sup>2</sup>, Benjamin H. Rotstein,<sup>3</sup> Anand Mehta<sup>1</sup>, Richard R. Drake<sup>1</sup>, Emilio I. Alarcon<sup>2,3</sup>, Peggi M. Angel<sup>1\*</sup>

1. Department of Cell and Molecular Pharmacology and Experimental Therapeutics, Medical University of South Carolina, Charleston, SC, USA

2. Division of Cardiac Surgery, University of Ottawa Heart Institute, Ottawa, Ontario K1Y4W7, Canada

3. Department of Biochemistry, Microbiology, and Immunology, University of Ottawa, Ottawa, Ontario K1H8M5, Canada



**Supplemental Table S1:** MALDI-IMS mapped human hydrogel peptides, showing both peptides that are unique to the human proteome as well as those that share mouse and human homology sequences. For those with human specific sequences, the corresponding mouse peptide and m/z is shown.

| Protein | Sequence                                                 | HYP | Centroid [m/z] | Human + Mouse Homology/Isobaric | Human Specific | Corresponding Mouse m/z (Sequence)                 |
|---------|----------------------------------------------------------|-----|----------------|---------------------------------|----------------|----------------------------------------------------|
| COL3A1  | GPP <sup>ox</sup> GPTGPG                                 | +   | 752.3231       |                                 |                | 766.3730 (GPPGPTGPA)                               |
| COL3A1  | LQGLP <sup>ox</sup> GTG                                  | +   | 758.4520       | +                               |                | 758.4520 (LQGIPGTG)                                |
| COL3A1  | GPP <sup>ox</sup> GLAGAP <sup>ox</sup>                   | +   | 768.3922       |                                 |                | 798.3992 (GPPGTAGIP)                               |
| COL3A1  | GPAGFP <sup>ox</sup> GAP <sup>ox</sup>                   | +   | 802.3981       | +                               |                |                                                    |
| COL3A1  | GPP <sup>ox</sup> GINGSP <sup>ox</sup>                   | +   | 827.4826       |                                 |                | 828.3482 (GPPGNNGSP)                               |
| COL3A1  | GPP <sup>ox</sup> GTAGFP <sup>ox</sup>                   | +   | 832.4206       | +                               |                |                                                    |
| COL3A1  | GPP <sup>ox</sup> GEP <sup>ox</sup> GQA                  | +   | 841.4255       | +                               |                |                                                    |
| COL3A1  | GPAGIP <sup>ox</sup> GFP <sup>ox</sup>                   | +   | 844.4086       |                                 | +              | 862.3764 (GPAGMP <sup>ox</sup> GFP <sup>ox</sup> ) |
| COL3A1  | GPAGIP <sup>ox</sup> GFP <sup>ox</sup>                   | +   | 844.4096       |                                 |                | 862.3764 (GPAGMPGFP)                               |
| COL3A1  | GAP <sup>ox</sup> GFRGPA                                 | +   | 845.4069       |                                 | +              | 845.4264 (GPSGFRGPA)                               |
| COL1A2  | GKEGPVGLP <sup>ox</sup>                                  | +   | 869.4550       | +                               |                |                                                    |
| COL1A1  | GRP <sup>ox</sup> GEAGLP <sup>ox</sup>                   | +   | 885.4538       | +                               |                |                                                    |
| COL1A1  | GSP <sup>ox</sup> GFQGLP <sup>ox</sup>                   | +   | 891.4158       | +                               |                |                                                    |
| COL1A1  | GRP <sup>ox</sup> GEVGP <sup>ox</sup> P                  | +   | 897.4448       | +                               |                |                                                    |
| COL1A2  | GERGVVGPQ                                                |     | 898.4464       | +                               |                |                                                    |
| COL1A1  | GQRGVVGLP <sup>ox</sup>                                  | +   | 898.5197       | +                               |                |                                                    |
| COL1A2  | GPP <sup>ox</sup> GFQGLP <sup>ox</sup>                   | +   | 901.4262       | +                               |                |                                                    |
| COL3A1  | VAVGGLAGYP <sup>ox</sup>                                 | +   | 919.4372       |                                 | +              |                                                    |
| COL3A1  | GQP <sup>ox</sup> GVMGFP <sup>ox</sup>                   | +   | 921.4389       |                                 |                |                                                    |
| COL1A2  | GNIGPVGAAGAP <sup>ox</sup>                               | +   | 996.4044       |                                 | +              | 998.4901 (GNIGPTGAAGAP)                            |
| COL1A1  | GPP <sup>ox</sup> SAGFDFS                                | +   | 997.4646       |                                 | +              | 999.4054 (GPPSSGGYDFS)                             |
| COL3A1  | IAGITGARGLA                                              |     | 999.5115       | +                               | +              | 999.5115 (IAGLTGARGLA)                             |
| COL1A2  | GARGSDGSVGPV                                             |     | 1058.5198      | +                               |                |                                                    |
| COL3A1  | SGVAVGGLAGYP <sup>ox</sup>                               | +   | 1063.5199      |                                 | +              |                                                    |
| COL3A1  | GPLGIAGITGAR                                             |     | 1082.6426      | +                               | +              | 1082.6426 (GPLGLAGITGAR)                           |
| COL3A1  | GP <sup>ox</sup> PGTAGFP <sup>ox</sup> GSP <sup>ox</sup> | +   | 1089.5523      | +                               |                |                                                    |
| COL1A2  | GSRGFP <sup>ox</sup> GADGVA                              | +   | 1106.4586      | +                               |                |                                                    |
| COL1A2  | GRTGEVGAVGP <sup>ox</sup> P                              | +   | 1112.5001      |                                 | +              |                                                    |
| COL1A1  | GPPSAGFDFS                                               |     | 1128.5681      |                                 | +              | 1130.4789 (GPPSSGGYDFS)                            |
| COL1A2  | FGYDGFYR                                                 |     | 1139.4483      |                                 | +              | 1137.5000 (FGFEGDFYR)                              |
| COL3A1  | GPLGIAGITGARG                                            |     | 1139.6670      | +                               | +              | 1139.6670 (GPLGLAGITGARG)                          |
| COL1A1  | GPPGPPSAGFDF                                             |     | 1145.4746      |                                 | +              | 1147.5055 (GPPGPPSSGGYDF)                          |
| COL1A2  | GGGYDFGYDGDF                                             |     | 1269.5981      |                                 | +              | 1267.4902 (GGGYDFGFEGDF)                           |
| COL1A1  | GAVGPAGKDGEAGAQ                                          |     | 1284.5619      | +                               |                |                                                    |
| COL1A2  | GP <sup>ox</sup> KGEIGAVGNAGPA                           | +   | 1310.6298      |                                 | +              | 1362.7012 (GPKGELGPVGNPGPA)                        |
| COL3A1  | GPLGIAGITGARGLA                                          |     | 1323.8029      | +                               | +              | 1323.8029 (GPLGLAGITGARGLA)                        |
| COL1A2  | VSGGGYDFGYDGDF                                           |     | 1455.6838      |                                 | +              | 1453.5907 (VSGGGYDFGFEGDF)                         |
| COL1A1  | GPPSAGFDFSFLPQ                                           |     | 1466.7614      |                                 | +              | 1468.6743 (GPPSSGGYDFSFLPQ)                        |
| COL1A2  | GPAGARGSDGSVGPVGP                                        |     | 1508.7727      | +                               |                |                                                    |
| COL1A2  | GPDGNKGEP <sup>ox</sup> GVVAVGTAGPS                      | +   | 1838.8609      |                                 | +              | 1726.7991 (GPDGNKGEAGAVGAPGSAGAS)                  |

**Supplemental Table S2:** Significantly Differentially Expressed human hydrogel derived peptides (ROC AUC); infarct ROI comparisons.

| <b>Groups</b> | <b>ROI</b> | <b>Protein</b> | <b>Peptide</b>                                           | <b>Centroid [m/z]</b> | <b>AUC</b> |
|---------------|------------|----------------|----------------------------------------------------------|-----------------------|------------|
| rhCI-Ctrl     | Infarct    | COL1A1         | GRP <sup>ox</sup> GEVGP <sup>ox</sup> P                  | 897.445               | 0.605      |
| rhCI-Ctrl     | Infarct    | COL1A2         | GSRGFP <sup>ox</sup> GADGVA                              | 1106.459              | 0.668      |
| rhCI-Ctrl     | Infarct    | COL1A1         | GPPSAGFDFSF                                              | 1128.568              | 0.689      |
| rhCI-Ctrl     | Infarct    | COL1A2         | GPAGARGSDGSPVGPVGP                                       | 1508.773              | 0.673      |
| rhCIII-Ctrl   | Infarct    | COL3A1         | GPP <sup>ox</sup> GTAGFP <sup>ox</sup>                   | 832.421               | 0.610      |
| rhCIII-Ctrl   | Infarct    | COL3A1         | GP <sup>ox</sup> PGTAGFP <sup>ox</sup> GSP <sup>ox</sup> | 1089.552              | 0.671      |

**Supplemental Table S3:** Proteins identified via LC-MS/MS analysis on infarcted and remote regions of tissue for PBS Ctrl, rhCI hydrogel, and rhCIII hydrogel treated samples. Protein level Fold Change values (Infarct/Remote) were used to create hierarchical cluster in Fig 4b, with the exception of those with INF (infinity) values. Proteins were identified with a minimum of 2 peptides and a protein threshold of 99% with less than 1% FDR.

|                                                                                                                  |              | Total Spectral Count |                                  |                                  |                                    |               |                |               |               |             |  |
|------------------------------------------------------------------------------------------------------------------|--------------|----------------------|----------------------------------|----------------------------------|------------------------------------|---------------|----------------|---------------|---------------|-------------|--|
| Accession Number                                                                                                 | Alternate ID | Molecular Weight     | Fold Change by Sample (Ctrl I/R) | Fold Change by Sample (rhCI I/R) | Fold Change by Sample (rhCIII I/R) | Ctrl_Infarc t | rhCIII_Infarct | rhCIII_Remote | rhCI_Infarc t | rhCI_Remote |  |
| <b>Bio View identified Proteins (33)</b>                                                                         |              |                      |                                  |                                  |                                    |               |                |               |               |             |  |
| 40S ribosomal protein SA OS=Mus musculus OX=10090 GN=Rpsa PE=1 SV=4                                              | Rpsa         | 33 kDa               | 0 INF                            | 0 INF                            | INF                                | 2             |                |               | 1             |             |  |
| 60 kDa heat shock protein, mitochondrial OS=Mus musculus OX=10090 GN=Hspd1 PE=1 SV=1                             | Hspd1        | 61 kDa               | 0 INF                            | 0 INF                            | INF                                | 2             |                |               |               |             |  |
| Basement membrane-specific heparan sulfate proteoglycan core protein OS=Mus musculus OX=10090 GN=Hspg2 PE=1 SV=1 | Hspg2        | 398 kDa              | 0.4                              | 1.5                              | 0.1                                | 6             | 1              | 6             | 11            | 7           |  |
| Biglycan OS=Mus musculus OX=10090 GN=Bgn PE=1 SV=1                                                               | Bgn          | 42 kDa               | 0 INF                            | 0 INF                            | INF                                | 0             |                |               | 2             |             |  |
| Collagen alpha-1(I) chain OS=Mus musculus OX=10090 GN=Col1a1 PE=1 SV=4                                           | Col1a1       | 138 kDa              | 1.2                              | 0.8                              | 1.2                                | 354           | 287            | 211           | 236           | 275         |  |
| Collagen alpha-1(III) chain OS=Mus musculus OX=10090 GN=Col3a1 PE=1 SV=4                                         | Col3a1       | 139 kDa              | 0.8                              | 0.7                              | 1                                  | 105           | 110            | 97            | 72            | 107         |  |
| Collagen alpha-1(V) chain OS=Mus musculus OX=10090 GN=Col4a1 PE=1 SV=4                                           | Col4a1       | 161 kDa              | 0.5                              | 0.5                              | 0.4                                | 9             | 7              | 14            | 8             | 16          |  |
| Collagen alpha-1(V) chain OS=Mus musculus OX=10090 GN=Col5a1 PE=1 SV=2                                           | Col5a1       | 184 kDa              | 0.9                              | 2                                | 0.4                                | 14            | 4              | 9             | 12            | 6           |  |
| Collagen alpha-1(VIII) chain OS=Mus musculus OX=10090 GN=Col8a1 PE=1 SV=3                                        | Col8a1       | 74 kDa               | 0.7                              | 1.5                              | 0.4                                | 9             | 4              | 10            | 9             | 6           |  |
| Collagen alpha-1(XI) chain OS=Mus musculus OX=10090 GN=Col11a1 PE=1 SV=2                                         | Col11a1      | 181 kDa              | INF                              | INF                              | INF                                | 3             | 0              |               | 2             | 0           |  |
| Collagen alpha-1(XII) chain OS=Mus musculus OX=10090 GN=Col12a1 PE=2 SV=3                                        | Col12a1      | 340 kDa              | 0.6 INF                          | 0.6 INF                          | 0                                  | 2             |                | 1             | 3             | 0           |  |
| Collagen alpha-1(XIV) chain OS=Mus musculus OX=10090 GN=Col14a1 PE=1 SV=2                                        | Col14a1      | 193 kDa              | 1.7                              | 4.9                              | 0.9                                | 3             | 1              | 1             | 5             | 1           |  |
| Collagen alpha-1(XV) chain OS=Mus musculus OX=10090 GN=Col15a1 PE=1 SV=2                                         | Col15a1      | 140 kDa              | 1.1                              | 2.9                              | 0.9                                | 2             | 1              | 1             | 3             | 1           |  |
| Collagen alpha-2(I) chain OS=Mus musculus OX=10090 GN=Col1a2 PE=1 SV=2                                           | Col1a2       | 130 kDa              | 1.1                              | 1.1                              | 1                                  | 506           | 367            | 328           | 347           | 313         |  |
| Collagen alpha-2(IV) chain OS=Mus musculus OX=10090 GN=Col4a2 PE=1 SV=4                                          | Col4a2       | 167 kDa              | 0.2                              | 0.7                              | 0.5                                | 3             | 3              | 5             | 7             | 10          |  |
| Collagen alpha-2(V) chain OS=Mus musculus OX=10090 GN=Col5a2 PE=1 SV=1                                           | Col5a2       | 145 kDa              | 1.4                              | 0.8                              | 0.4                                | 17            | 4              | 9             | 12            | 14          |  |
| Collagen alpha-2(VI) chain OS=Mus musculus OX=10090 GN=Col6a2 PE=1 SV=3                                          | Col6a2       | 110 kDa              | 0.1                              | 1                                | 0.9                                | 1             | 1              | 1             | 1             | 1           |  |
| Collagen alpha-2(VIII) chain OS=Mus musculus OX=10090 GN=Col8a2 PE=2 SV=2                                        | Col8a2       | 67 kDa               | INF                              | 0.5                              | 0                                  | 4             | 0              | 1             | 1             | 2           |  |
| EMILIN-1 OS=Mus musculus OX=10090 GN=Emilin1 PE=1 SV=1                                                           | Emilin1      | 108 kDa              | 0.6                              | 1                                | 0                                  | 2             |                | 1             | 2             | 2           |  |
| Elastin OS=Mus musculus OX=10090 GN=Ein PE=1 SV=2                                                                | Ein          | 72 kDa               | 0.8                              | 2.7                              | 0.3                                | 32            | 4              | 13            | 30            | 11          |  |
| Fibrinogen alpha chain OS=Mus musculus OX=10090 GN=Fga PE=1 SV=1                                                 | Fga          | 87 kDa               | 3.4                              | 0.5                              | 0.4                                | 6             | 1              | 2             | 1             | 2           |  |
| Fibrinogen beta chain OS=Mus musculus OX=10090 GN=Fgb PE=1 SV=1                                                  | Fgb          | 55 kDa               | INF                              | INF                              | INF                                | 2             |                | 0             | 1             |             |  |
| Fibrinogen gamma chain OS=Mus musculus OX=10090 GN=Fgg PE=1 SV=1                                                 | Fgg          | 49 kDa               | INF                              | INF                              | INF                                |               |                | 0             | 3             |             |  |
| Fibronectin OS=Mus musculus OX=10090 GN=Fn1 PE=1 SV=4                                                            | Fn1          | 273 kDa              | INF                              | INF                              | INF                                | 1             |                |               | 9             |             |  |
| Galectin-3 OS=Mus musculus OX=10090 GN=Lgals3 PE=1 SV=3                                                          | Lgals3       | 28 kDa               | INF                              | INF                              | INF                                | 1             |                |               | 2             |             |  |
| Gelsolin OS=Mus musculus OX=10090 GN=Gsn PE=1 SV=3                                                               | Gsn          | 86 kDa               | 0.06                             | 2.9                              | INF                                | 1             | 0              | 9             | 3             | 1           |  |
| Laminin subunit alpha-2 OS=Mus musculus OX=10090 GN=Lama2 PE=1 SV=2                                              | Lama2        | 344 kDa              | 0 INF                            | 0 INF                            | INF                                | 4             |                | 4             | 1             | 0           |  |
| Laminin subunit gamma-1 OS=Mus musculus OX=10090 GN=Lamc1 PE=1 SV=2                                              | Lamc1        | 177 kDa              | 0.2 INF                          | 0.2 INF                          | INF                                | 1             |                | 3             | 1             |             |  |
| Microfibril-associated glycoprotein 4 OS=Mus musculus OX=10090 GN=Mfap4 PE=1 SV=1                                | Mfap4        | 29 kDa               | INF                              | INF                              | INF                                | 2             |                |               | 1             |             |  |
| Nidogen-1 OS=Mus musculus OX=10090 GN=Nid1 PE=1 SV=2                                                             | Nid1         | 137 kDa              | 0.4                              | 1                                | 0                                  | 2             |                | 3             | 1             | 1           |  |
| Periostin OS=Mus musculus OX=10090 GN=Postn PE=1 SV=2                                                            | Postn        | 93 kDa               | 0.7                              | 1.4                              | 0.7                                | 13            | 3              | 4             | 10            | 7           |  |
| Tenascin OS=Mus musculus OX=10090 GN=Tnc PE=1 SV=1                                                               | Tnc          | 232 kDa              | INF                              | INF                              | INF                                | 2             |                |               | 2             |             |  |
| Transforming growth factor-beta-induced protein ig-h3 OS=Mus musculus OX=10090 GN=Tgfb1 PE=1 SV=1                | Tgfb1        | 75 kDa               | INF                              | INF                              | INF                                | 0             |                |               | 2             |             |  |

**Supplemental Table S4:** Pathway annotations for non-collagen type proteins identified in LC-MS/MS experiments. Pathways were annotated in Scaffold v5 via reactome.org

| Pathway                                     | % of Displayed Proteins |       |        | Protein Accession Numbers      |
|---------------------------------------------|-------------------------|-------|--------|--------------------------------|
|                                             | Ctrl                    | rhCI  | rhCIII |                                |
| Chondroitin sulfate biosynthesis            | 3.03                    | 3.13  | 0.00   | P28653                         |
| Collagen biosynthesis and modifying enzymes | 42.42                   | 43.75 | 63.64  | P25318, Q61245                 |
| Collagen chain trimerization                | 42.42                   | 43.75 | 63.64  | P25318, Q61245                 |
| Degradation of the extracellular matrix     | 12.12                   | 12.50 | 13.64  | P54320, Q05793, P11276, P10493 |
| Dermatan sulfate biosynthesis               | 3.03                    | 3.13  | 0.00   | P28653                         |
| ECM proteoglycans                           | 30.30                   | 31.25 | 31.82  | Q05793, P11276, P28653, Q80YX1 |
| Fibronectin matrix formation                | 3.03                    | 3.13  | 0.00   | P11276                         |
| Non-integrin membrane-ECM interactions      | 30.30                   | 31.25 | 40.91  | Q05793, P11276, Q61245         |



**Supplemental Table S5:** MALDI-mapped endogenous mouse ECM peptides identified via LC-MS/MS proteomics. \*Mouse peptides that share homology sequences with human peptides (+) were mapped via MALDI-ECM-IMS, but were not used for the endogenous mouse differential expression experiments (**Fig. 4c**). Lowercase 'm' represents oxidation of Methionine.

| Centroid [m/z] | Protein name                | Alternate IDs | Peptide sequence                                                      | Human Homology* | Peptide identification probability | Discriminant Score | Hyperscore | Nextscore |
|----------------|-----------------------------|---------------|-----------------------------------------------------------------------|-----------------|------------------------------------|--------------------|------------|-----------|
| 1,013.51       | Collagen alpha-2(I) chain   | Col1a2        | GPAGAAAGATGARG                                                        |                 | 99.70%                             | 4.96               | 23.1       | 14.1      |
| 1052.5848      | Collagen alpha-2(I) chain   | Col1a2        | GSVGPVAVGPR                                                           |                 | 99.70%                             | 3.91               | 25.5       | 13.3      |
| 1064.5161      | Elastin                     | Eln           | FGAGAGVPGFGAG                                                         |                 | 99.60%                             | 4.55               | 25.9       | 15.8      |
| 1082.6319      | Collagen alpha-1(I) chain   | Col1a1        | IAGQRGVVGLP <sup>ox</sup>                                             | +               | 99.40%                             | 3.07               | 25.5       | 14.6      |
| 1088.5332      | Collagen alpha-2(I) chain   | Col1a2        | GPVGRGTGETGAS                                                         |                 | 99.70%                             | 4.49               | 23.5       | 12.6      |
| 1095.5181      | Collagen alpha-1(I) chain   | Col1a1        | GPAGQDGRP <sup>ox</sup> GPA                                           |                 | 99.50%                             | 4.37               | 22.3       | 18.6      |
| 1139.6534      | Collagen alpha-1(III) chain | Col3a1        | GPLGIAGLTGARG                                                         |                 | 99.70%                             | 5.68               | 32.5       | 19.9      |
| 1154.6056      | Collagen alpha-2(I) chain   | Col1a2        | GKEGPVGLP <sup>ox</sup> GID                                           | +               | 99.60%                             | 4.27               | 24.5       | 16.8      |
| 1179.5577      | Collagen alpha-1(I) chain   | Col1a1        | GARGQAGVmGFP <sup>ox</sup>                                            | +               | 98.90%                             | 3.45               | 22.1       | 13.8      |
| 1187.5806      | Collagen alpha-2(I) chain   | Col1a2        | GPRGEAGNIGFP <sup>ox</sup>                                            |                 | 99.70%                             | 4.28               | 27.4       | 17.1      |
| 1229.5912      | Collagen alpha-1(I) chain   | Col1a1        | GFP <sup>ox</sup> GERGVQGP <sup>ox</sup>                              | +               | 98.30%                             | 3.78               | 28.5       | 26.7      |
| 1231.5954      | Gelsolin                    | Gsn           | LVADENPFAQGA                                                          | +               | 99.70%                             | 5.38               | 28.1       | 14.9      |
| 1266.6327      | Collagen alpha-2(I) chain   | Col1a2        | GEP <sup>ox</sup> GPAGSVGPVAV                                         |                 | 98.80%                             | 3.62               | 27.8       | 27.8      |
| 1267.6393      | Collagen alpha-1(III) chain | Col3a1        | GPP <sup>ox</sup> GTAGIP <sup>ox</sup> GARGGA                         |                 | 98.40%                             | 3.47               | 22.4       | 20.2      |
| 1277.6962      | Collagen alpha-2(I) chain   | Col1a2        | GPAGSVGPVAVGPR                                                        |                 | 99.40%                             | 4.32               | 32.3       | 18        |
| 1283.6340      | Collagen alpha-2(I) chain   | Col1a2        | GPAGARGSDGSVGPV                                                       | +               | 97.60%                             | 3.77               | 24.2       | 15.1      |
| 1302.6916      | Collagen alpha-1(I) chain   | Col1a1        | GPIGPAGARGPAGPQ                                                       |                 | 99.70%                             | 6.91               | 32.5       | 15.1      |
| 1311.5968      | Collagen alpha-1(I) chain   | Col1a1        | GPAGFAGPP <sup>ox</sup> GADGQP                                        | +               | 99.10%                             | 2.94               | 27.1       | 27.1      |
| 1312.6131      | Collagen alpha-2(I) chain   | Col1a2        | GPDGNKGEAGAVGAP <sup>ox</sup>                                         |                 | 97.10%                             | 3.67               | 22.9       | 14.8      |
| 1323.7746      | Collagen alpha-1(III) chain | Col3a1        | GPLGIAGLTGARGLA                                                       |                 | 99.50%                             | 4.99               | 24.2       | 16.3      |
| 1325.5973      | Collagen alpha-1(III) chain | Col3a1        | GPTGPAGDKGDSGP <sup>ox</sup> P                                        |                 | 97.80%                             | 3.73               | 23.3       | 23.3      |
| 1349.6336      | Collagen alpha-2(V) chain   | Col5a2        | GPAGPAGEP <sup>ox</sup> GKEGP <sup>ox</sup> P                         |                 | 99.70%                             | 4.83               | 23.7       | 23.7      |
| 1349.6812      | Collagen alpha-1(IV) chain  | Col4a1        | IRGDP <sup>ox</sup> GPP <sup>ox</sup> GVQGPA                          |                 | 99.00%                             | 4.2                | 30.8       | 26.5      |
| 1354.5584      | Collagen alpha-1(I) chain   | Col1a1        | GPPGEP <sup>ox</sup> GEP <sup>ox</sup> GGSGPM                         |                 | 99.70%                             | 5.17               | 32.8       | 28.2      |
| 1362.6401      | Collagen alpha-1(I) chain   | Col1a1        | GPAGQDGRP <sup>ox</sup> GPAGP <sup>ox</sup> P                         |                 | 99.10%                             | 4.41               | 25.4       | 25.4      |
| 1383.6689      | Collagen alpha-2(I) chain   | Col1a2        | GLP <sup>ox</sup> GADGRAGVMGP <sup>ox</sup> P                         | +               | 99.50%                             | 4.52               | 27.6       | 27.6      |
| 1395.6979      | Collagen alpha-1(I) chain   | Col1a1        | GSP <sup>ox</sup> GTPGPQGIAGQR                                        |                 | 99.70%                             | 5.37               | 26.7       | 17.7      |
| 1399.6638      | Collagen alpha-2(I) chain   | Col1a2        | GLP <sup>ox</sup> GADGRAGVmGP <sup>ox</sup> P                         | +               | 99.70%                             | 6.07               | 27.8       | 27.8      |
| 1400.6444      | Collagen alpha-2(V) chain   | Col5a2        | GPNGEQGSAGIP <sup>ox</sup> GPF                                        | +               | 99.70%                             | 3.36               | 22.5       | 17.4      |
| 1407.7594      | Collagen alpha-2(I) chain   | Col1a2        | GPRGEVGLP <sup>ox</sup> GLSGPV                                        | +               | 99.70%                             | 4.13               | 34.9       | 22.2      |
| 1421.6481      | Collagen alpha-2(I) chain   | Col1a2        | GmTGFP <sup>ox</sup> GAAGRTGP <sup>ox</sup> P                         | +               | 97.90%                             | 3.41               | 19.4       | 19.4      |
| 1442.7060      | Collagen alpha-1(I) chain   | Col1a1        | GLQGMP <sup>ox</sup> GERGAAGLP <sup>ox</sup>                          | +               | 98.90%                             | 4                  | 25.9       | 21.4      |
| 1472.6915      | Collagen alpha-1(III) chain | Col3a1        | GRDGTP <sup>ox</sup> GGP <sup>ox</sup> GIRGMP <sup>ox</sup>           |                 | 99.70%                             | 5.37               | 26.8       | 24.7      |
| 1484.6726      | Collagen alpha-2(I) chain   | Col1a2        | GPAGASGDRGEAGAAGPS                                                    |                 | 99.70%                             | 7.06               | 34.4       | 14.3      |
| 1508.7454      | Collagen alpha-2(I) chain   | Col1a2        | GPAGARGSDGSVGPVAVGPA                                                  | +               | 99.60%                             | 4.9                | 37.3       | 20.7      |
| 1518.8025      | Collagen alpha-2(I) chain   | Col1a2        | GPAGSVGPVAVGPRGSPS                                                    |                 | 99.70%                             | 6.86               | 29.4       | 15.6      |
| 1524.7768      | Collagen alpha-2(I) chain   | Col1a2        | GAAGATGARGLVGE <sup>ox</sup> GPA                                      | +               | 99.70%                             | 8.82               | 44.5       | 39.6      |
| 1528.6513      | Collagen alpha-1(I) chain   | Col1a1        | GSP <sup>ox</sup> GSP <sup>ox</sup> GEQGPSGASGPA                      |                 | 99.70%                             | 5.43               | 33.3       | 24.4      |
| 1534.7613      | Collagen alpha-1(III) chain | Col3a1        | GPP <sup>ox</sup> GTAGIP <sup>ox</sup> GARGGAGP <sup>ox</sup> P       |                 | 99.70%                             | 6.27               | 32.1       | 32.1      |
| 1534.8116      | Collagen alpha-2(I) chain   | Col1a2        | IAGALGEP <sup>ox</sup> GPLGISGP <sup>ox</sup> P                       |                 | 99.70%                             | 4.83               | 44.9       | 42.4      |
| 1566.7035      | Collagen alpha-1(I) chain   | Col1a1        | GPP <sup>ox</sup> GP <sup>ox</sup> AGEKGS <sup>ox</sup> GADGPA        | +               | 98.90%                             | 3.38               | 25.2       | 22.9      |
| 1578.7985      | Collagen alpha-2(I) chain   | Col1a2        | GPVGPAGVRSQGSQGP                                                      |                 | 97.20%                             | 2.79               | 17.2       | 11.1      |
| 1579.7964      | Tenascin                    | Tnc           | LDNLSKITAQQQYE                                                        |                 | 99.70%                             | 10.5               | 34.7       | 13.2      |
| 1580.8759      | Collagen alpha-1(III) chain | Col3a1        | GSP <sup>ox</sup> GPLGIAGLTGARGLA                                     |                 | 99.20%                             | 4.25               | 22.7       | 22.7      |
| 1584.7327      | Collagen alpha-1(III) chain | Col3a1        | GSP <sup>ox</sup> GGKGEMGPAGIP <sup>ox</sup> GAP <sup>ox</sup>        | +               | 97.50%                             | 3.49               | 26.3       | 24.5      |
| 1585.7720      | Collagen alpha-1(I) chain   | Col1a1        | GANGAP <sup>ox</sup> GIAGAP <sup>ox</sup> GFP <sup>ox</sup> GAR       | +               | 99.70%                             | 3.8                | 24.2       | 16.4      |
| 1594.6656      | Periostin                   | Postn         | FAPSNEAWENLSD                                                         |                 | 99.70%                             | 7.46               | 33         | 16.4      |
| 1625.7770      | Collagen alpha-1(I) chain   | Col1a1        | GPP <sup>ox</sup> GSAGSP <sup>ox</sup> GKDGLNGLP <sup>ox</sup>        |                 | 98.00%                             | 3.71               | 24.3       | 22.1      |
| 1644.7140      | Collagen alpha-2(I) chain   | Col1a2        | FQGPAGEP <sup>ox</sup> GEP <sup>ox</sup> GQTGP <sup>ox</sup> A        | +               | 99.70%                             | 4.79               | 24.7       | 23        |
| 1672.7752      | Collagen alpha-2(I) chain   | Col1a2        | GPP <sup>ox</sup> GMTGFP <sup>ox</sup> GAAGRTGP <sup>ox</sup> P       | +               | 99.70%                             | 5.14               | 24.4       | 24.4      |
| 1674.9177      | Collagen alpha-1(V) chain   | Col5a1        | GPP <sup>ox</sup> GEVIQPLPIQASR                                       | +               | 99.70%                             | 5.87               | 28.1       | 25.9      |
| 1698.8157      | Collagen alpha-2(I) chain   | Col1a2        | GPRGDQGPVGRGTGETGAS                                                   |                 | 99.00%                             | 4.49               | 20.6       | 11.6      |
| 1699.8184      | Collagen alpha-2(I) chain   | Col1a2        | GSRGLP <sup>ox</sup> GADGRAGVmGP <sup>ox</sup> P                      | +               | 99.70%                             | 5.25               | 27.1       | 27.1      |
| 1710.8774      | Collagen alpha-1(I) chain   | Col1a1        | GPKGTAGEP <sup>ox</sup> GKAGERGLP <sup>ox</sup>                       |                 | 99.70%                             | 8.41               | 33         | 16.9      |
| 1743.7608      | Collagen alpha-1(V) chain   | Col5a1        | GTTGPTGQM GDP <sup>ox</sup> GERGP <sup>ox</sup> P                     |                 | 99.70%                             | 4.4                | 20.7       | 20.7      |
| 1767.8624      | Collagen alpha-2(I) chain   | Col1a2        | GSAGASGPGGLP <sup>ox</sup> GERGAAGIP <sup>ox</sup>                    |                 | 99.70%                             | 5.26               | 31.4       | 22.2      |
| 1795.8098      | Collagen alpha-1(I) chain   | Col1a1        | GPAGEKGS <sup>ox</sup> GADGPAGSP <sup>ox</sup> GTP                    |                 | 99.70%                             | 4.95               | 24.7       | 24.7      |
| 1908.8939      | Collagen alpha-1(I) chain   | Col1a1        | GEAGKP <sup>ox</sup> GEQGVPGDLGAP <sup>ox</sup> GPS                   | +               | 99.10%                             | 4                  | 26.9       | 26.9      |
| 1913.8475      | Collagen alpha-1(I) chain   | Col1a1        | GLAGP <sup>ox</sup> PGESGREGSP <sup>ox</sup> GAEGSP <sup>ox</sup>     |                 | 98.40%                             | 2.73               | 17.7       | 17.7      |
| 2142.9943      | Collagen alpha-2(I) chain   | Col1a2        | GP <sup>ox</sup> PGFVGEKGPSGEP <sup>ox</sup> GTAGAP <sup>ox</sup> GTA |                 | 99.70%                             | 8.73               | 34.9       | 34.9      |
| 2278.0489      | Collagen alpha-2(I) chain   | Col1a2        | GPQGFQGPAGEP <sup>ox</sup> GEP <sup>ox</sup> GQTGPAGPR                |                 | 98.80%                             | 3.59               | 39.9       | 32.8      |
| 2279.0152      | Collagen alpha-1(I) chain   | Col1a1        | GPQGFQGPAGEP <sup>ox</sup> GEP <sup>ox</sup> GGSGPMGPR                |                 | 99.00%                             | 3.18               | 37.6       | 29        |

**Supplemental Table S6:** Significantly Differentially Expressed Endogenous Mouse Peptides (ROC AUC); whole heart and infarct ROI comparisons. AUC thresholds of this study were 0.6.

| Centroid [m/z] | ppm   | Alternate IDs | Peptide sequence                                                      | Ctrl-rhCI AUC whole heart | Ctrl-rhCIII AUC whole heart | rhCI-rhCIII AUC whole heart | Ctrl-rhCI AUC at Infarct | Ctrl-rhCIII AUC at Infarct | rhCI-rhCIII AUC at Infarct |
|----------------|-------|---------------|-----------------------------------------------------------------------|---------------------------|-----------------------------|-----------------------------|--------------------------|----------------------------|----------------------------|
| 1088.5332      | 7.83  | Col1a2        | GPVGRTGETGAS                                                          | <b>0.651</b>              | 0.532                       | <b>0.618</b>                | 0.508                    | 0.550                      | 0.548                      |
| 1187.5806      | 7.42  | Col1a2        | GPRGEAGNIGFP <sup>ox</sup>                                            | <b>0.600</b>              | 0.505                       | <b>0.608</b>                | 0.547                    | 0.530                      | 0.517                      |
| 1302.6916      | 12.14 | Col1a1        | GPIGPAGARGPAGPQ                                                       | <b>0.630</b>              | 0.543                       | <b>0.619</b>                | 0.536                    | 0.566                      | <b>0.748</b>               |
| 1349.6466      | 15.72 | Col5a2        | GPAGPAGEP <sup>ox</sup> GKEGP <sup>ox</sup> P                         | <b>0.683</b>              | 0.549                       | <b>0.628</b>                | 0.527                    | 0.517                      | 0.544                      |
| 1534.7613      | 14.11 | Col3a1        | GPP <sup>ox</sup> GTAGIP <sup>ox</sup> GARGGAGP <sup>ox</sup> P       | 0.406                     | 0.584                       | <b>0.662</b>                | <b>0.600</b>             | <b>0.800</b>               | <b>0.710</b>               |
| 1698.8173      | 11.30 | Col1a2        | GPRGDQGPVGRTGETGAS                                                    | 0.499                     | 0.574                       | 0.571                       | <b>0.610</b>             | <b>0.744</b>               | 0.580                      |
| 1743.7608      | 5.50  | Col5a1        | GTTGPTGQM GDP <sup>ox</sup> GERGP <sup>ox</sup> P                     | 0.528                     | 0.576                       | 0.547                       | 0.580                    | <b>0.680</b>               | <b>0.607</b>               |
| 2142.9943      | 12.49 | Col1a2        | GP <sup>ox</sup> PGFVGEKGPSGEP <sup>ox</sup> GTAGAP <sup>ox</sup> GTA | 0.539                     | 0.564                       | 0.526                       | <b>0.657</b>             | <b>0.674</b>               | 0.543                      |
